# Supplementary material
Source: PubMed Central journal article supplement (PMC4151705)
Supplement: es502056d_si_001.pdf [file es502056d_si_001.pdf]

SUPPORTING INFORMATION SECTION

**In Situ Chemical Oxidation of Contaminated Groundwater by Persulfate:  
Decomposition by Fe(III)- and Mn-Containing Oxides and Aquifer Materials**

Haizhou Liu<sup>†‡</sup>, Thomas A. Bruton<sup>†</sup>, Fiona M. Doyle<sup>§</sup>, and David L. Sedlak<sup>\*†</sup>

<sup>†</sup> Department of Civil and Environmental Engineering, University of California at  
Berkeley, Berkeley, CA 94720 USA

<sup>§</sup> Department of Material Science and Engineering, University of California at Berkeley,  
Berkeley, CA 94720 USA

<sup>‡</sup> Current address: Department of Chemical and Environmental Engineering, University of  
California at Riverside

\* Corresponding author, e-mail: [sedlak@berkeley.edu](mailto:sedlak@berkeley.edu), phone (510) 643-0256

*Submitted to Environmental Science and Technology*

# Table of Contents

|                                                                                                                                                                                                                                                                            |    |
|----------------------------------------------------------------------------------------------------------------------------------------------------------------------------------------------------------------------------------------------------------------------------|----|
| Procedure to prepare minerals of iron and manganese oxides.....                                                                                                                                                                                                            | 4  |
| Table S1 Characterization of aquifer materials, clay materials and pure minerals.....                                                                                                                                                                                      | 5  |
| Table S2 Chemical composition of synthetic groundwater used in this study.....                                                                                                                                                                                             | 6  |
| Table S3 Comparison of pseudo first-order reaction rates of persulfate decomposition in synthetic groundwater and in MQ water.....                                                                                                                                         | 7  |
| Table S4 Reaction Rate Constants Used in Branching Ratio Calculations.....                                                                                                                                                                                                 | 8  |
| Figure S1 XRD spectra of synthesized goethite $\alpha$ -FeOOH. The XRD spectra confirmed that the synthesized particles are pure goethite. ....                                                                                                                            | 8  |
| Figure S2 Stability of persulfate in the presence of different mass loadings of silica. ....                                                                                                                                                                               | 9  |
| Figure S3 Persulfate loss in homogeneous system. ....                                                                                                                                                                                                                      | 10 |
| <b>Figure S4 (A)</b> Formation of sulfate during the activation of persulfate by aquifer solid and the mass balance on sulfate species. <b>(B)</b> Comparison of persulfate consumption rate during pyrolusite activation both in the presence and absence of oxygen. .... | 11 |
| Figure S5 Correlation between dissolved oxygen generation and persulfate consumption during activation by pyrolusite in anaerobic condition.....                                                                                                                           | 12 |

### **Procedure to prepare minerals of iron and manganese oxides**

Four types of pure minerals were employed in this study, *i.e.*, amorphous ferrihydrite ( $\text{Fe}(\text{OH})_{3(s)}$ ), goethite ( $\alpha\text{-FeOOH}_{(s)}$ ), pyrolusite ( $\beta\text{-MnO}_{2(s)}$ ) and silica ( $\text{SiO}_2$ ). Pyrolusite and ferrihydrite were directly obtained from Sigma-Aldrich. Pyrolusite was used without further processing. Ferrihydrite was aged in deionized water buffered at pH 8.0 with 50 mM borate for 2 weeks prior to experiments, with daily pH adjustment to 8.0 by adding 1 mM NaOH. After that, ferrihydrite suspension was centrifuged and the particles were washed three times with deionized water before finally dried with a freeze dry system. Silica obtained as pure sand (ACROS Organics) was rinsed in 0.1 M  $\text{HClO}_4$  at a concentration of 300 g/L. After 24 hours, the solution was decanted and replaced. This step was repeated for 3 consecutive days. After that, silica particles were freeze-dried. Goethite was synthesized by aging freshly made ferrihydrite in a concentrated NaOH solution at 70 °C for 60 hours.

**Table S1** Characterization of aquifer materials, clay materials and pure minerals.

| <b>Material Type</b>    | <b>Material Name</b>                          | <b>BET Surface area (m<sup>2</sup>/g)</b> | <b>Total Fe (wt %)</b> | <b>Total Mn (wt %)</b> | <b>Sand (wt %)</b> | <b>Silt (wt %)</b> | <b>Clay (wt%)</b> |
|-------------------------|-----------------------------------------------|-------------------------------------------|------------------------|------------------------|--------------------|--------------------|-------------------|
| <b>Aquifer Material</b> | CADOU                                         | 3.9                                       | 0.77%                  | 0.01%                  | 84%                | 16%                | 4%                |
|                         | CAROL                                         | 39.8                                      | 2.49%                  | 0.02%                  | 63%                | 18%                | 19%               |
|                         | AWBPH                                         | 14.3                                      | 1.67%                  | 0.03%                  | 82%                | 10%                | 8%                |
|                         | AFTCS                                         | 27.7                                      | 1.44%                  | 0.03%                  | 60%                | 22%                | 18%               |
|                         | AMTAL                                         | 16.2                                      | 1.85%                  | 0.12%                  | 64%                | 22%                | 14%               |
| <b>Clay Material</b>    | Nontronite                                    | 69.0                                      | 26.2%                  | 0.01%                  | --                 | --                 | 100%              |
|                         | Montmorillonite                               | 32.0                                      | 2.6%                   | 0.05%                  | --                 | --                 | 100%              |
| <b>Pure Mineral</b>     | Goethite<br>$\alpha\text{-FeOOH}_{(s)}$       | 37.1                                      | 62.9%                  | --                     | --                 | --                 | --                |
|                         | Ferrihydrite<br>$\text{Fe}(\text{OH})_{3(s)}$ | 180.1                                     | 52.3%                  | --                     | --                 | --                 | --                |
|                         | Pyrolusite<br>$\beta\text{-MnO}_{2(s)}$       | 0.11                                      | --                     | 62.8%                  | --                 | --                 | --                |
|                         | Silica<br>$\text{SiO}_{2(s)}$                 | 27.0                                      | --                     | --                     | --                 | --                 | --                |

**Table S2** Chemical composition of synthetic groundwater used in this study.

| <b>Chemical parameter</b>     | <b>Concentration</b> |
|-------------------------------|----------------------|
| Na <sup>+</sup>               | 23 mg/L              |
| Ca <sup>2+</sup>              | 20 mg/L              |
| Mg <sup>2+</sup>              | 5 mg/L               |
| SO <sub>4</sub> <sup>2-</sup> | 20 mg/L              |
| Cl <sup>-</sup>               | 35.5 mg/L            |
| Br <sup>-</sup>               | 0.1 mg/L             |
| NO <sub>3</sub> <sup>-</sup>  | 1 mg/L               |
| HCO <sub>3</sub> <sup>-</sup> | 1 mM                 |
| TDS                           | 166 mg/L             |
| Suwannee River NOM            | 1 mg C/L             |
| pH                            | 8                    |

The solution was buffered at pH 8.0 with 50 mM borate. The use of high buffer concentration was necessary to maintain a constant pH throughout the experiment.

- Experimental condition is with 50 g/L of minerals, initial persulfate concentration 1 mM and pH 8. In experiments with benzene, the initial concentration of benzene was 1 mM.

**Table S3** Comparison of pseudo first-order reaction rates of persulfate decomposition in synthetic groundwater and in MQ water.

| Type of mineral | Pseudo 1 <sup>st</sup> -order reaction rate (d <sup>-1</sup> )* |                      |                       |                      |
|-----------------|-----------------------------------------------------------------|----------------------|-----------------------|----------------------|
|                 | Without benzene                                                 |                      | With benzene          |                      |
|                 | Synthetic groundwater                                           | MQ water             | Synthetic groundwater | MQ water             |
| Goethite        | $5.4 \times 10^{-3}$                                            | $3.1 \times 10^{-3}$ | $9.4 \times 10^{-3}$  | $1.0 \times 10^{-2}$ |
| Ferrihydrite    | $3.2 \times 10^{-3}$                                            | $4.3 \times 10^{-3}$ | $3.4 \times 10^{-2}$  | $3.9 \times 10^{-2}$ |
| Pyrolusite      | $1.3 \times 10^{-3}$                                            | $4.2 \times 10^{-3}$ | $3.0 \times 10^{-3}$  | $8.2 \times 10^{-3}$ |

\* Experimental condition is with 50 g/L of minerals, initial persulfate concentration 1 mM and pH 8. In experiments with benzene, the initial concentration of benzene was 1 mM. In both synthetic groundwater and MQ water matrix, 50 mM borate was added as pH buffer.

**Table S4** Reaction Rate Constants Used in Branching Ratio Calculations.

|     | <b>Reaction</b>                                                                                      | <b>Rate Constant</b> | <b>Units</b>   |
|-----|------------------------------------------------------------------------------------------------------|----------------------|----------------|
| 5.  | $SO_4^{\bullet-} + S_2O_8^{2-} \rightarrow S_2O_8^{\bullet-} + SO_4^{2-}$                            | $6.3 \times 10^5$    | $M^{-1}s^{-1}$ |
| 7.  | $SO_4^{\bullet-} + H_2O \rightarrow SO_4^{2-} + HO^{\bullet} + H^+$                                  | 660                  | $s^{-1}$       |
| 8.  | $SO_4^{\bullet-} + OH^- \rightarrow SO_4^{2-} + HO^{\bullet}$                                        | $4.6 \times 10^7$    | $M^{-1}s^{-1}$ |
| 13. | $SO_4^{\bullet-} + \text{C}_6\text{H}_6 \dashrightarrow SO_4^{2-} + \text{C}_6\text{H}_6^{\bullet+}$ | $3 \times 10^9$      | $M^{-1}s^{-1}$ |
| 14. | $SO_4^{\bullet-} + Cl^- \rightarrow SO_4^{2-} + Cl^{\bullet}$                                        | $3.0 \times 10^8$    | $M^{-1}s^{-1}$ |
| 15. | $SO_4^{\bullet-} + Br^- \rightarrow SO_4^{2-} + Br^{\bullet}$                                        | $3.5 \times 10^9$    | $M^{-1}s^{-1}$ |
| 16. | $SO_4^{\bullet-} + HCO_3^- \rightarrow CO_3^{\bullet-} + SO_4^{2-} + H^+$                            | $2.8 \times 10^6$    | $M^{-1}s^{-1}$ |
| 17. | $CO_3^{\bullet-} + S_2O_8^{2-} \rightarrow CO_3^{2-} + S_2O_8^{\bullet-}$                            | $3.0 \times 10^7$    | $M^{-1}s^{-1}$ |

The solution was buffered at pH 8.0 with 50 mM borate. The use of high buffer concentration was necessary to maintain a constant pH throughout the experiment.

- Experimental condition is with 50 g/L of minerals, initial persulfate concentration 1 mM and pH 8. In experiments with benzene, the initial concentration of benzene was 1 mM.

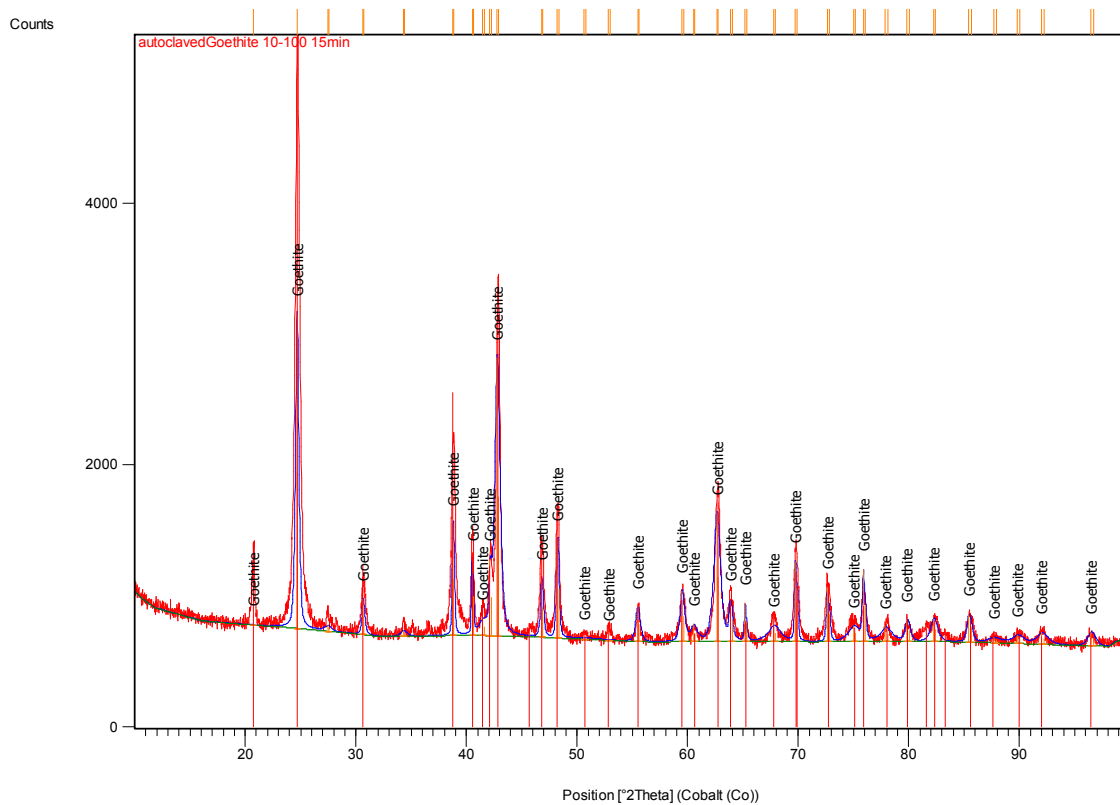

**Figure S1** XRD spectra of synthesized goethite  $\alpha$ -FeOOH. The XRD spectra confirmed that the synthesized particles are pure goethite.



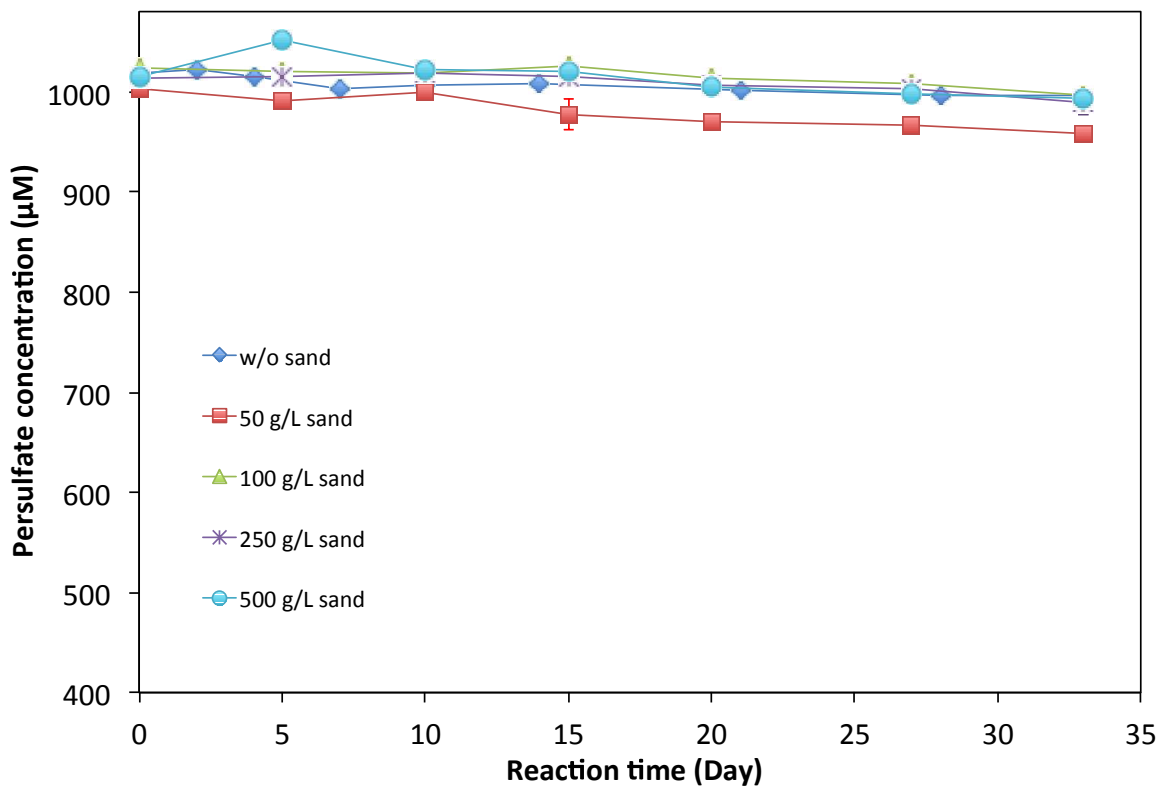

**Figure S2** Stability of persulfate in the presence of different mass loadings of silica. In contrast to accelerated persulfate decomposition with increasing Fe- and Mn-containing minerals, persulfate was stable in the presence of silica at varying mass loadings.

Persulfate 1 mM, pH 8.0, ionic strength 55 mM.

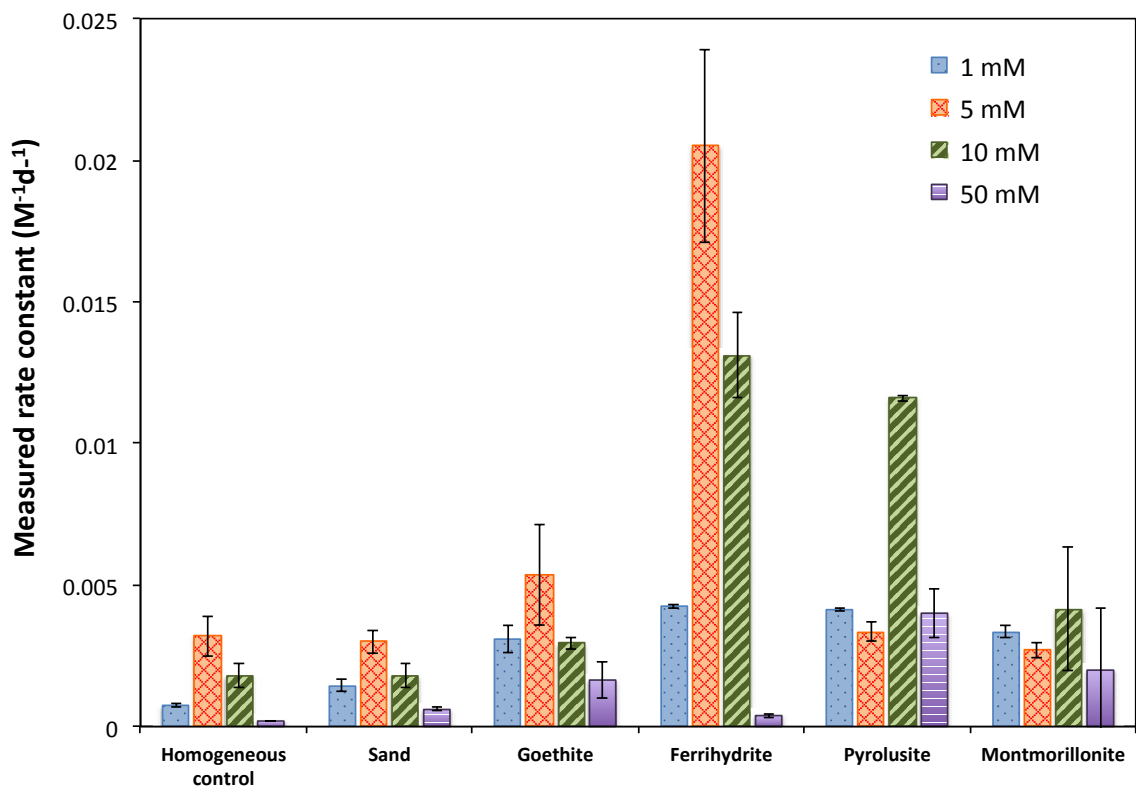

**Figure S3** Persulfate loss in homogeneous system. Solid mass loading is 50 g/L, pH 8.0.

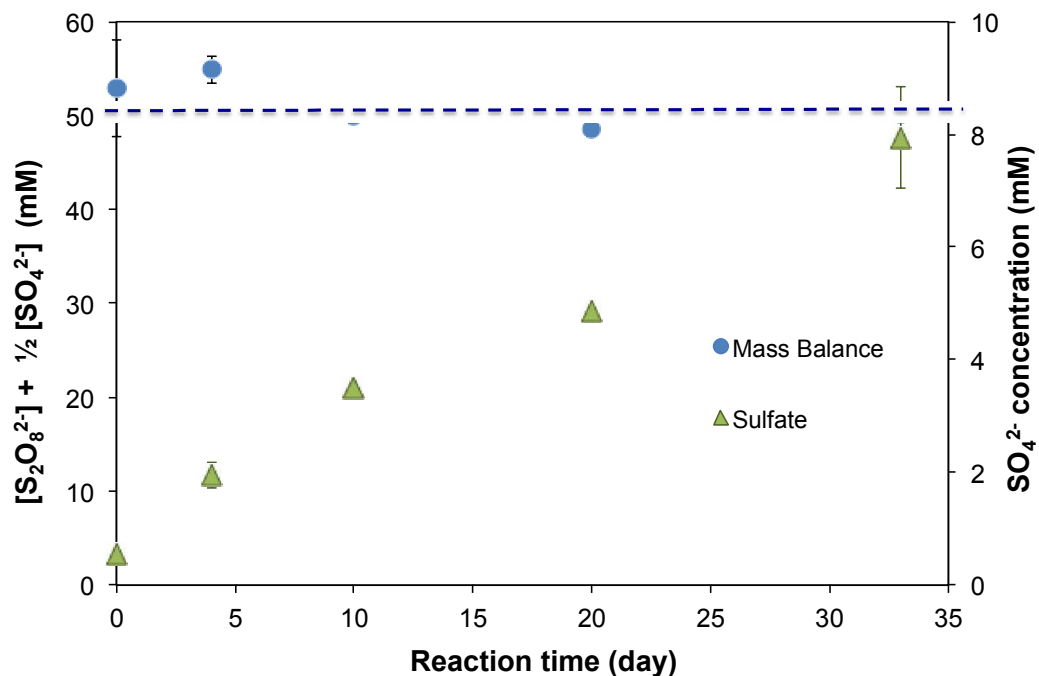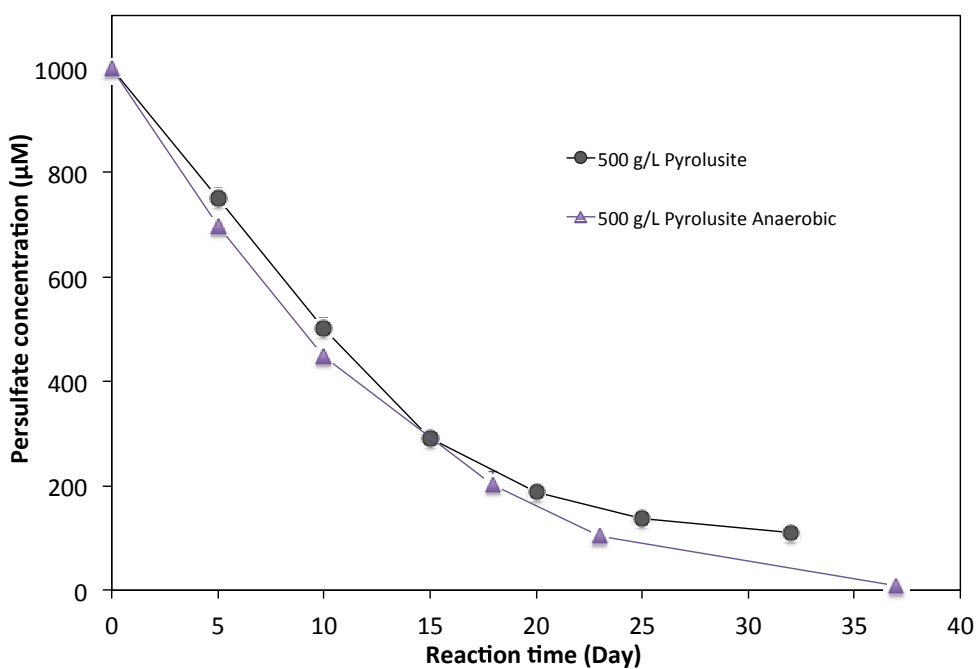

**Figure S4** (A) Formation of sulfate during the decomposition of persulfate by aquifer solids and the mass balance on sulfate species. Initial persulfate concentration 50 mM, aquifer solid concentration 500 g/L, pH 8.0. (B) Comparison of persulfate decomposition rate during pyrolusite activation both in the presence and absence of oxygen.

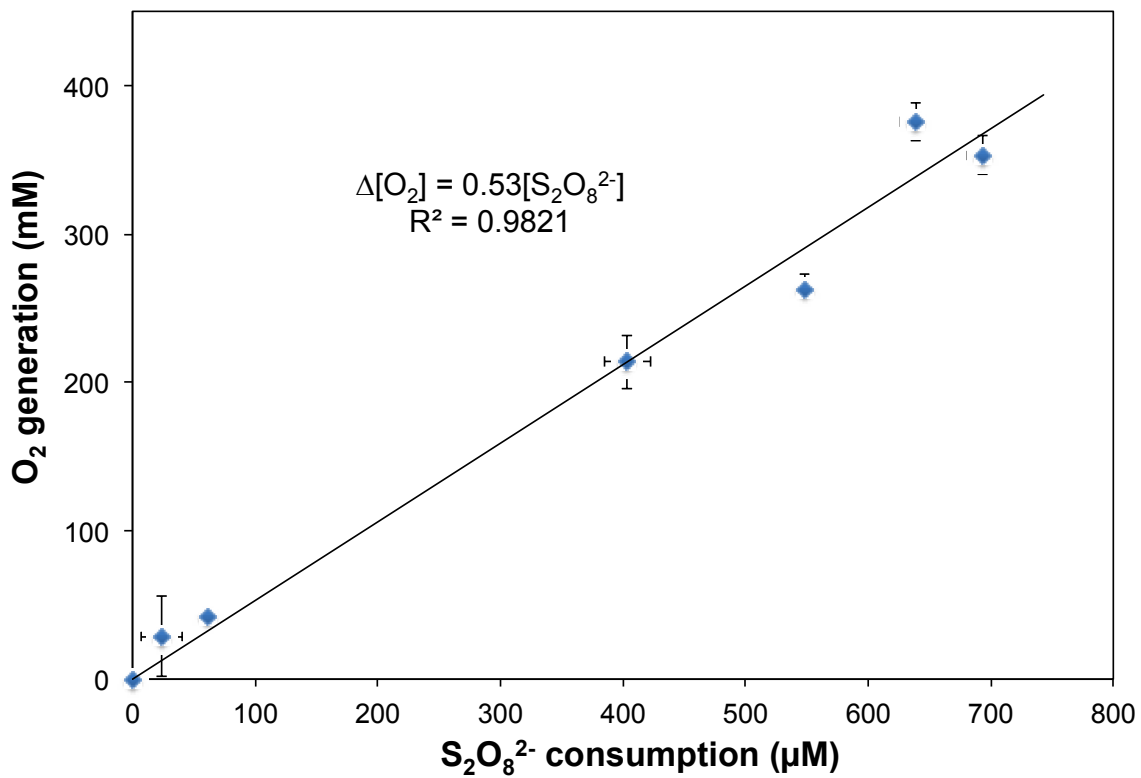

**Figure S5** Correlation between dissolved oxygen generation and persulfate consumption during decomposition by pyrolusite under anaerobic conditions.

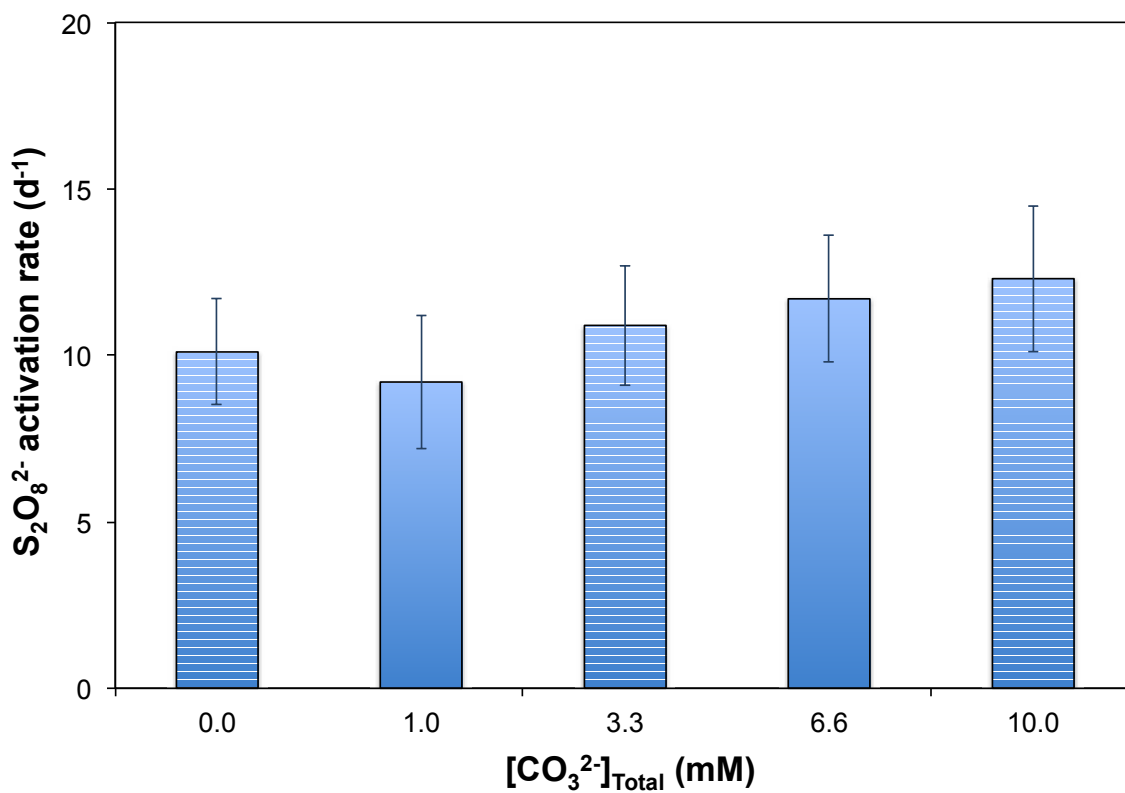

**Figure S6** Impact of carbonate concentration on persulfate stability and reaction rate in pyrolusite system. Initial persulfate concentration 1 mM, initial benzene concentration 1 mM, pyrolusite 50 g/L, pH 8.0.

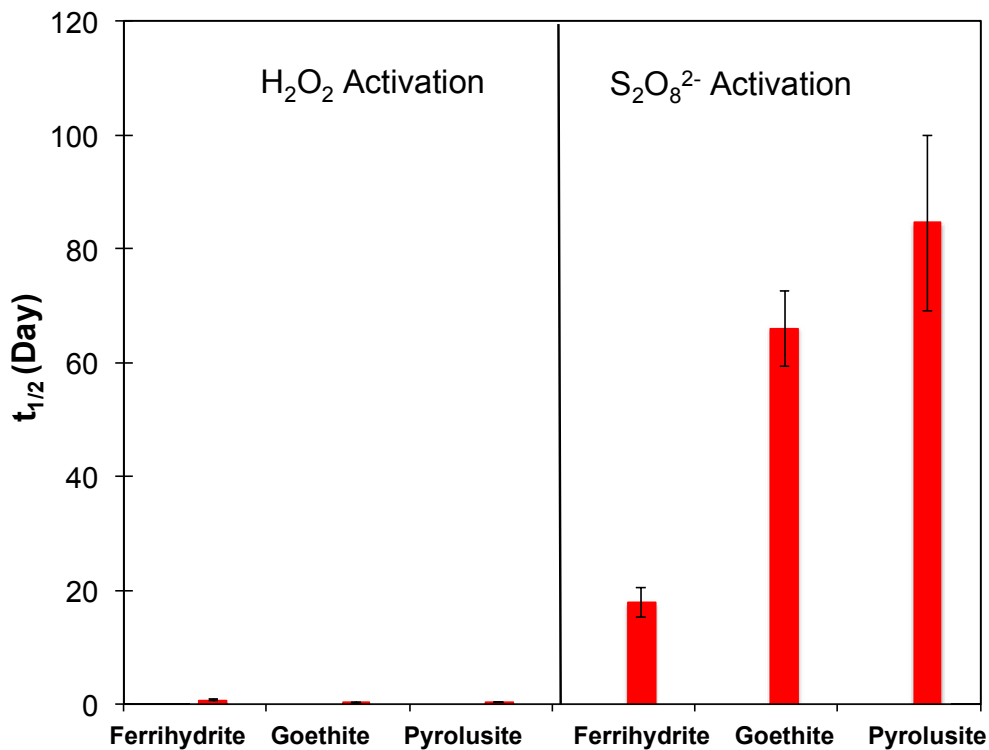

**Figure S7** Comparison of half-lives of persulfate vs. hydrogen peroxide (Fenton system) in the presence of different pure minerals. Initial persulfate or hydrogen peroxide concentration was 1 mM. Initial benzene concentration=1 mM. Mineral concentration=50 g/L, pH=8, with 50 mM borate buffer.

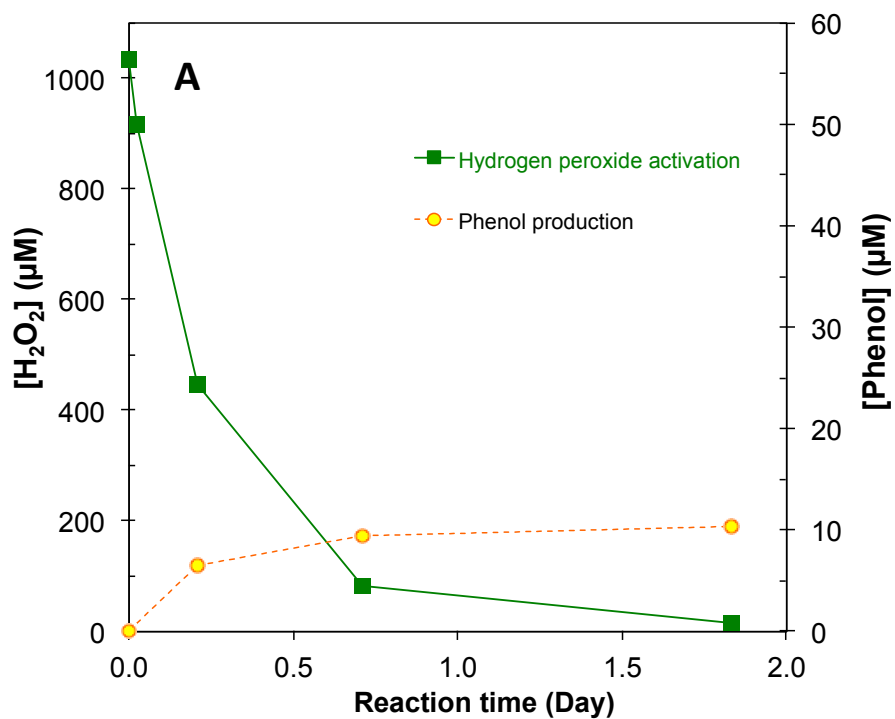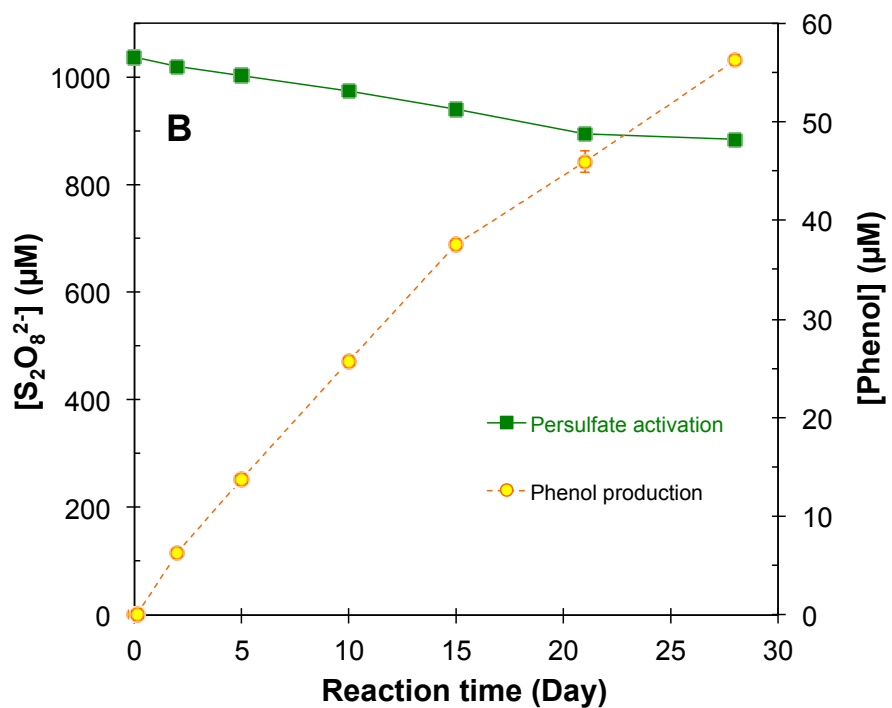

**Figure S8** Formation of phenol in systems with hydrogen peroxide and persulfate, respectively. Initial oxidant concentration 1 mM; initial benzene concentration 1 mM; pH 8.0. (A) Hydrogen peroxide; (B) persulfate.
